# Supplementary material for: Spectroscopic, microscopic and first rheological investigations in charge-transfer interaction induced organogels
Source: Royal Society of Chemistry journal article supplement (doi:10.1039/c0jm01192d), 2010-01-01
Supplement: c0jm01192d.pdf [file c0jm01192d.pdf]

## Supporting Information

### Spectroscopic, Microscopic and first Rheological investigations in Charge-transfer interaction induced Organogels

Rajat K. Das, Supratim Banerjee, Guillaume Raffy, André del Guerzo, J.-P. Desvergne and  
Uday Maitra\*

#### Table of contents:

|                                                                                                                                                                 |    |
|-----------------------------------------------------------------------------------------------------------------------------------------------------------------|----|
| Synthetic routes for compounds <b>1, 2, 3, 4, 5</b> and <b>6</b>                                                                                                | S3 |
| Synthesis of esters <b>S1-S5</b> and <b>S7</b>                                                                                                                  | S4 |
| General procedure for the synthesis of the carboxamides <b>1-6</b>                                                                                              | S4 |
| Synthesis of compounds <b>7-11</b>                                                                                                                              | S5 |
| Gelation test                                                                                                                                                   | S6 |
| Gel-sol transition temperature ( $T_{gel}$ )                                                                                                                    | S6 |
| Variable temperature spectral study                                                                                                                             | S7 |
| Rheology                                                                                                                                                        | S7 |
| Scanning Electron Microscopy                                                                                                                                    | S7 |
| Transmission Electron Microscopy                                                                                                                                | S8 |
| Confocal Fluorescence Microscopy                                                                                                                                | S8 |
| <b>Figure S1.</b> Variation of the emission spectra ( $\lambda_{ex} = 360$ nm) on heating a gel of <b>3/TNF</b> (3:2) in 1-decanol (conc. of <b>3</b> : 17 mM). | S9 |
| <b>Figure S2.</b> Variation of the emission spectra ( $\lambda_{ex} = 360$ nm) on heating a gel of <b>4/TNF</b> (1:1) in 1-pentanol (conc. 12.3 mM).            | S9 |

|                                                                                                                                                                                                                                        |     |
|----------------------------------------------------------------------------------------------------------------------------------------------------------------------------------------------------------------------------------------|-----|
| <b>Figure S3.</b> Variation of the emission spectra ( $\lambda_{\text{ex}} = 360 \text{ nm}$ ) on heating a gel of <b>5/TNF (1:1)</b> in 1-octanol (conc. 11.8 mM).                                                                    | S10 |
| <b>Figure S4.</b> Absorption spectrum of TNF in $\text{CHCl}_3$ (2.4 mM).                                                                                                                                                              | S10 |
| <b>Figure S5.</b> (a) Dynamic frequency sweep experiment (at a constant stress of 6 Pa) and (b) stress sweep experiment (at a frequency of 1 Hz) with 1-octanol gels of <b>4/TNF (1:1)</b> (square) and <b>4/TNF (1:0.5)</b> (circle). | S11 |
| <b>References</b>                                                                                                                                                                                                                      | S11 |

### Scheme S1. Synthetic routes for 1 and 2.

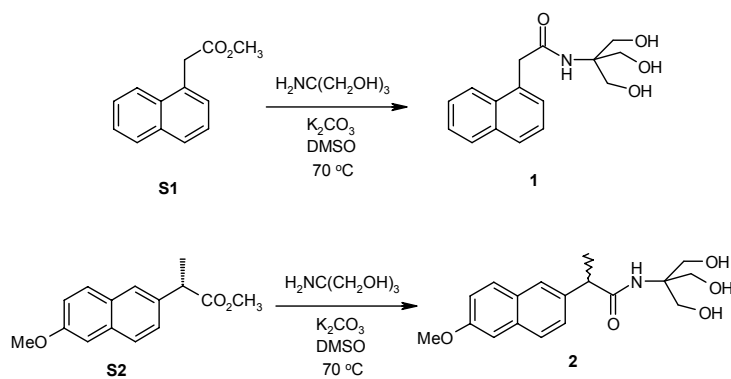

### Scheme S2. Synthetic route for 3.

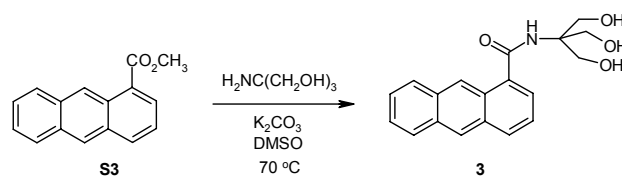

### Scheme S3. Synthetic route for 4.

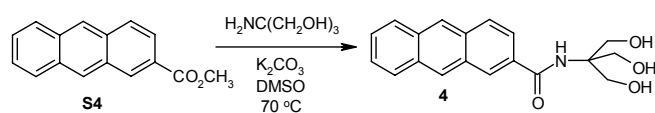

### Scheme S4. Synthetic route for 5.

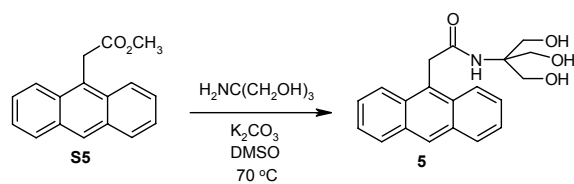

### Scheme S5. Synthetic route for 6.

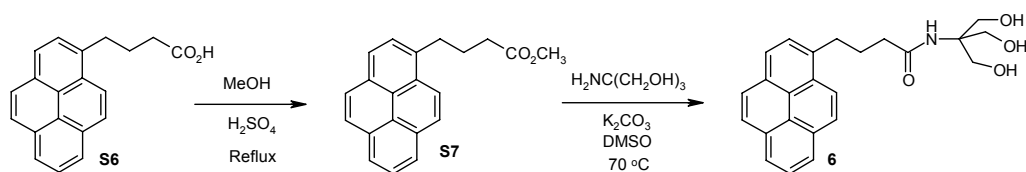

### Synthesis of esters **S1-S5** and **S7**.

The synthesis of esters **S1**, **S2** and **S7** was achieved from the corresponding acids following the standard procedure of refluxing with MeOH/H<sub>2</sub>SO<sub>4</sub>. Compounds **S1** and **S2** are known in the literature.<sup>1</sup> For the column purification of **S7**, 3 % EtOAc/hexanes was used as the eluent, affording the pure ester **S7** in 90 % yield (light yellow liquid). <sup>1</sup>H NMR (300 MHz, CDCl<sub>3</sub>): δ (ppm) 2.19 (2H, m), 2.47 (2H, t), 3.39 (2H, t), 3.69 (3H, s), 7.79 (1H, d), 7.84-8.28 (7H, m), 8.33 (1H, d).

Starting from anthracene, ester **S3** was synthesized following a reported procedure.<sup>2</sup>

Starting from phthalic anhydride, standard protocols<sup>3</sup> were followed to obtain anthraquinone-2-carboxylic acid, which was converted to ester **S4** following a literature procedure.<sup>4</sup>

Starting from 9-anthracenecarbinol, ester **S5** was obtained in 4 steps following a literature procedure.<sup>5</sup>

### General procedure for the synthesis of the carboxamides **1-6**.

The ester (0.2 mmol) was taken in a 10 mL rb flask, to which TRIS (0.3 mmol) and K<sub>2</sub>CO<sub>3</sub> (0.3 mmol) were added. After adding DMSO (0.3 mL), the reaction mixture was stirred at 70 °C for 24 h. The solvent was removed *in vacuo*, and the residual solid was adsorbed on silica using MeOH (dry packing) and purified on a silica gel (100-200 mesh) column using 30-80 % EtOAc/CHCl<sub>3</sub> as the eluent.

Following this procedure, carboxamide **1** was obtained in 74 % yield (white amorphous solid). Mp 149-152 °C. IR (KBr, cm<sup>-1</sup>): 3277 (br), 1630. <sup>1</sup>H NMR (300 MHz, DMSO-d<sub>6</sub>): δ 3.53 (6H, d, *J* = 5.4 Hz), 3.97 (2H, s), 4.72 (3H, t, *J* = 5.4 Hz), 7.42-7.52 (5H, m), 7.78-7.92 (2H, m), 8.05 (1H, unresolved d). <sup>13</sup>C NMR (75 MHz, DMSO-d<sub>6</sub>): δ 171.76, 133.43, 132.92, 132.14, 128.46, 127.85, 127.21, 126.09, 125.76, 125.61, 124.36, 62.48, 60.75. Anal. Calcd for C<sub>16</sub>H<sub>19</sub>NO<sub>4</sub>: C, 66.42; H, 6.62; N, 4.84. Found: C, 66.08; H, 6.76; N, 4.99. LRMS: TOF EI-MS 312 (M<sup>+</sup> + Na).

Carboxamide **2** was obtained in 53 % yield (white amorphous solid). Mp 126-128 °C. <sup>1</sup>H NMR (300 MHz, DMSO-d<sub>6</sub>): δ 1.38 (3H, d, *J* = 6.9 Hz), 3.52-3.55 (6H, m), 3.84 (3H, s), 3.86 (1H, q), 4.72 (3H, t, *J* = 5.4 Hz), 7.10-7.14 (1H, m), 7.22 (1H, s), 7.25 (1H, unresolved d), 7.42-7.45 (1H, m), 7.71 (1H, br s), 7.74 (1H, s), 7.77 (1H, s). <sup>13</sup>C NMR (75 MHz, DMSO-d<sub>6</sub>): δ 175.06, 157.10, 137.44, 133.21, 129.23, 128.48, 126.73, 126.60, 125.43, 118.64,

105.78, 62.20, 60.74, 55.24, 45.27, 18.84. Anal. Calcd for  $C_{18}H_{23}NO_5 \cdot \frac{1}{2}H_2O$ : C, 63.14; H, 7.07; N, 4.09. Found: C, 63.16; H, 6.70; N, 4.36. LRMS: TOF EI-MS 356 ( $M^+ + Na$ ).

Carboxamide **3** was obtained in 63 % yield (deep yellow amorphous solid). Mp 178-179 °C. IR (KBr,  $cm^{-1}$ ): 3340, 3303, 3052, 2931, 2873, 1627, 1610, 1523.  $^1H$  NMR (300 MHz, DMSO- $d_6$ ):  $\delta$  3.80 (6H, d,  $J = 5.4$  Hz), 4.84 (3H, t,  $J = 5.4$  Hz), 7.49-7.63 (5H, m), 8.05-8.17 (3H, m), 8.62 (1H, s), 8.93 (1H, s).  $^{13}C$  NMR (100 MHz, DMSO- $d_6$ ):  $\delta$  170.09, 136.01, 131.86, 131.60, 131.54, 130.39, 128.91, 128.34, 128.19, 126.90, 126.46, 126.38, 125.35, 124.97, 124.87, 63.61, 60.88, 60.79. Anal. Calcd for  $C_{19}H_{19}NO_4$ : C, 70.14; H, 5.89; N, 4.30. Found: C, 70.17; H, 6.07; N, 4.51. LRMS: TOF EI-MS 348 ( $M^+ + Na$ ).

Carboxamide **4** was obtained in 67 % yield (deep yellow amorphous solid). Mp 200-202 °C. IR (KBr,  $cm^{-1}$ ): 3380, 3329, 3254, 2945, 2884, 1639, 1519.  $^1H$  NMR (300 MHz, DMSO- $d_6$ ):  $\delta$  3.78 (6H, d,  $J = 4.8$  Hz), 4.88 (3H, br s), 7.56-7.59 (3H, m), 7.85 (1H, d,  $J = 8.7$  Hz), 8.14 (3H, unresolved t), 8.62 (2H, d,  $J = 9.9$  Hz), 8.73 (1H, s).  $^{13}C$  NMR (75 MHz, DMSO- $d_6$ ):  $\delta$  167.54, 132.24, 132.06, 131.67, 130.12, 128.25, 127.79, 126.47, 126.07, 123.85, 62.96, 60.52. MS: Calcd for  $C_{19}H_{19}NO_4 + Na$ : 348.1207. Found: 348.1212.

Carboxamide **5** was obtained in 55 % yield (pale yellow amorphous solid). Mp 210-212 °C. IR (KBr,  $cm^{-1}$ ): 3373, 3340, 3051, 2885, 2840, 1633, 1525.  $^1H$  NMR (300 MHz, DMSO- $d_6$ ):  $\delta$  4.58 (2H, s), 4.77 (3H, t,  $J = 5.4$  Hz), 7.47-7.56 (4H, m), 7.63 (1H, s), 8.06-8.09 (2H, m), 8.29 (2H, unresolved d), 8.52 (1H, s).  $^{13}C$  NMR (100 MHz, DMSO- $d_6$ ):  $\delta$  171.57, 131.21, 130.58, 128.92, 128.88, 126.41, 125.97, 125.22, 125.09, 62.53, 60.80, 35.07. MS: Calcd for  $C_{20}H_{21}NO_4 + Na$ : 362.1368. Found: 362.1366.

Carboxamide **6** was obtained in 60 % yield (pale yellow amorphous solid). Mp 173-175 °C. IR (KBr,  $cm^{-1}$ ): 3275, 3042, 2939, 2876, 1643, 1550.  $^1H$  NMR (300 MHz, DMSO- $d_6$ ):  $\delta$  1.98 (2H, t), 2.29 (2H, t,  $J = 7.2$  Hz), 3.30 (2H, t,  $J = 7.6$  Hz), 4.83 (3H, t,  $J = 5.4$  Hz), 7.17 (1H, s), 7.93 (1H, d,  $J = 3.9$  Hz), 8.01-8.10 (3H, m), 8.18-8.27 (4H, m), 8.36 (1H, d,  $J = 4.5$  Hz).  $^{13}C$  NMR (100 MHz, DMSO- $d_6$ ):  $\delta$  173.84, 136.79, 131.05, 130.59, 129.47, 128.31, 127.77, 127.64, 127.41, 126.69, 126.35, 125.14, 125.12, 124.98, 124.40, 124.31, 123.70, 62.44, 60.90, 35.80, 32.27, 27.90. MS: Calcd for  $C_{24}H_{25}NO_4 + Na$ : 414.1681. Found: 414.1676.

### Synthesis of 7-11

Compounds **7-11** were prepared following reported procedures.<sup>6</sup>

## Gelation test

A weighed amount of the gelator (with or without one equivalent of TNF) in an organic liquid was heated in a sealed tube to a homogenous solution. The solution was then cooled either in air or by dipping in ice-water bath. The gel formation was observed within a few minutes.

## Gel-sol transition temperature ( $T_{\text{gel}}$ )

The gel-sol transition temperature ( $T_{\text{gel}}$ ) was recorded by the inverted test tube method. Gels prepared in sealed tubes (diameter 8 mm, gel volume 0.3 or 0.4 mL) were kept upside down in thermostat and the temperature of the thermostat was raised slowly ( $2^{\circ}\text{C}/\text{min}$ ). The temperature at which the gel fell under gravity was noted as the  $T_{\text{gel}}$ .

For the comparison of thermal stability in different solvents, all the CT gels were made with 1:1 mol ratio of donor:TNF. The CT gels based on donors **3-5** were prepared in 0.4 mL of solvent. Before commencing the experiment, the **3/TNF** gels were stabilized for 1 h, whereas the gels of **4/TNF** and **5/TNF** were stabilized for 6 h. The CT gels of **7-9** were made in 0.3 mL of solvent and stabilized for 12 h.

### **Variable temperature spectral study**

Appropriate amounts of the anthracene derivative and TNF were dissolved in the gelling solvent by heating and transferred to a quartz cuvette of 1 mm path length for variable temperature UV studies, whereas for the variable temperature fluorescence studies, a quartz cuvette of 2 mm path length was used. For preparing the CT gels of **3-5**, the cuvette was again heated to  $\sim 120$  °C and then dipped in ice-water bath for  $\sim 2$  min. After that, the cuvette was allowed to come to rt ( $\sim 28$  °C) and the already formed gel was stabilized for  $\sim 20$  min. before the experiment. The gel was then heated in steps of 5 °C, and kept at each temperature for  $\sim 20$  min, before recording the absorbance/fluorescence. For the CT gels of **7-9**, the cuvette with the hot sol was kept at rt to allow gel formation. The gels were stabilized at rt for 6h. The temperature was varied from 25°C to 65°C and the spectra were recorded at 5°C intervals (at each temperature, the system was equilibrated for 10 min).

### **Rheology**

Dynamic rheological measurements were done on the gels on a AR 1000 rheometer (TA instruments) using plate-plate (hatched) geometry (20 mm diameter, 400  $\mu$ m gap). For measurements on the CT gels derived from the donors **3-5**, the rheometer stage was pre-cooled to 5 °C (for 1-octanol gels) or 10 °C (for 1-decanol gels) and the hot sols ( $\sim 120$  °C) were quickly placed over the stage using a pre-heated pasteur pipette ( $\sim 0.5$  mL). The stage was kept at this temperature for further 2 min. and then heated up to 25 °C. The gel on the stage was stabilized for  $\sim 15$  min. (for **4/TNF** gels) or  $\sim 30$  min. (for **3/TNF** and **5/TNF** gels) at 25 °C. The geometry gap was then set and the experiment was started immediately. For the CT gels of **7-9**, the gel was introduced on the stage (at 25 °C) as a hot sol and immediately after gel formation, the geometry gap was set. The gel was then stabilized for 15 min. before starting the experiment.

### **Scanning Electron Microscopy**

The gels were melted to make sols and these sols were drop cast ( $\sim 10$ -100  $\mu$ L) on the carbon tape of SEM holders. After initial drying in air for a few hours, they were kept under high vacuum for several hours. Then the xerogels were gold coated (10 nm thick) using a BAL-TEC SSD-500 sputter coater instrument and imaged.

### **Transmission Electron Microscopy**

The gels were melted to sols and 10  $\mu\text{L}$  of the sols were drop-cast onto a carbon coated copper grid and allowed to dry at rt for a few hours. Then an aqueous 0.1% uranyl acetate solution was drop-cast on the samples and allowed to dry at rt for a few more hours. Finally the samples were further dried under high vacuum for 5-6 h before imaging.

### **Confocal Fluorescence Microscopy**

The confocal fluorescence microscopy (CFM) measurements were performed on a Picoquant Microtime 200. The Ti-Sa laser chain includes a Coherent Mira and a frequency doubler and affords pulses of 4-6 ps at 385 nm. The beam is injected by 90° reflection on a dichroic mirror in the microscope and the emission is detected by a time-resolved avalanche photodiode (MPD). The room is thermostated at 23°C with air-conditioning. The Picoquant Symphotime software is used to image the fluorescence intensity.



### Variable Temperature Fluorescence Spectra of 3/TNF gel in 1-decanol.

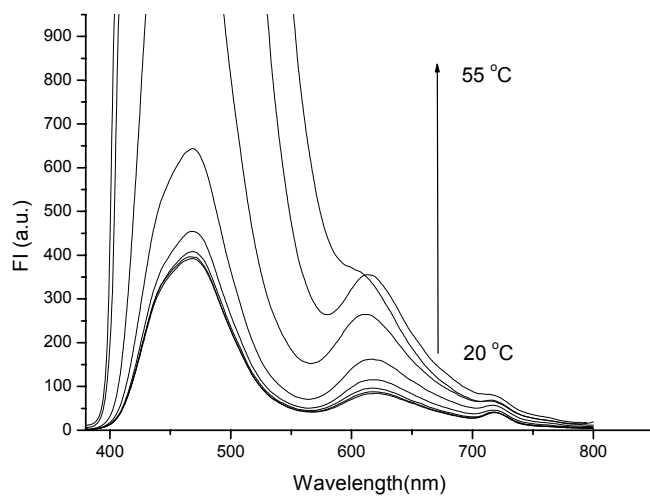

**Figure S1.** Variation of the emission spectra on heating a gel of **3**/TNF (3:2) in 1-decanol (conc. of **3** : 17 mM).  $\lambda_{\text{ex}} = 360$  nm.

### Variable Temperature Fluorescence Spectra of 4/TNF gel in 1-pentanol.

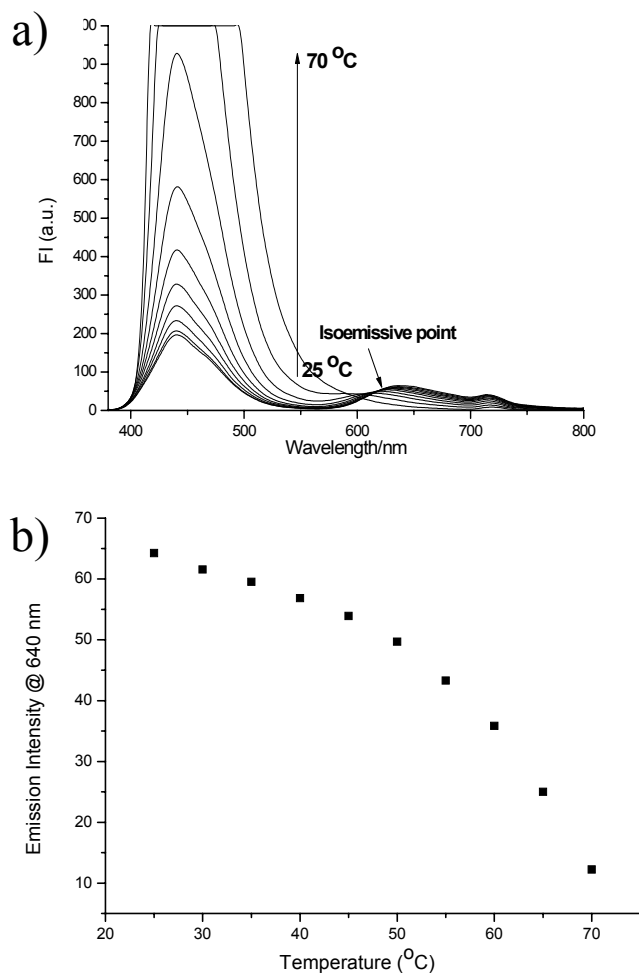

**Figure S2.** Variation of the emission spectra on heating a gel of **4**/TNF (1:1) in 1-pentanol (conc. 12.3 mM).  $\lambda_{\text{ex}} = 360$  nm.

### Variable Temperature Fluorescence Spectra of 5/TNF gel in 1-octanol.

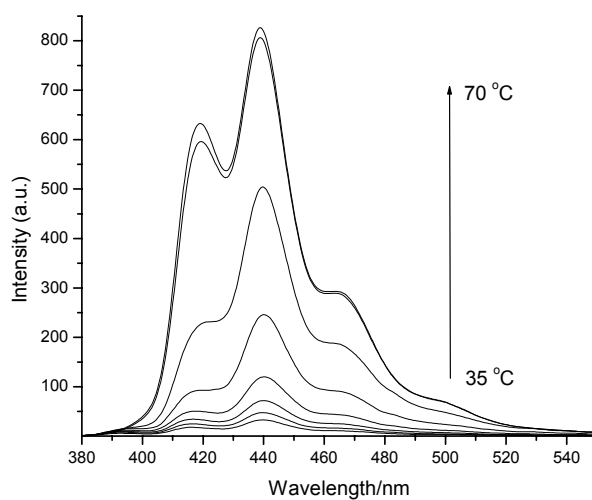

**Figure S3.** Variation of the emission spectra on heating a gel of 5/TNF (1:1) in 1-octanol (conc. 11.8 mM).  $\lambda_{\text{ex}} = 360$  nm.

### Absorption Spectrum of TNF in $\text{CHCl}_3$ .

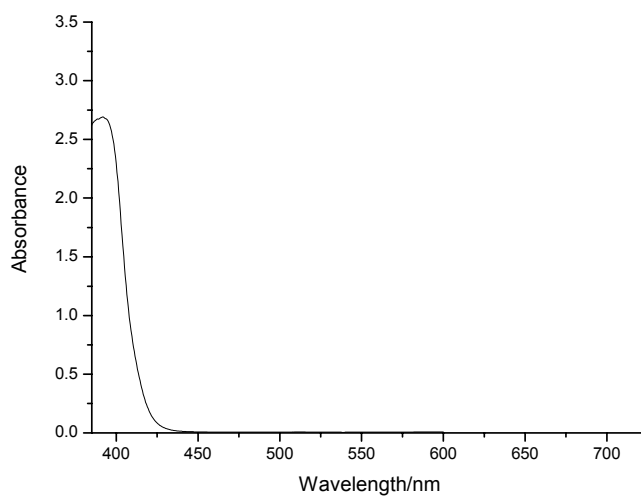

**Figure S4.** Absorption spectrum of TNF in  $\text{CHCl}_3$  (2.4 mM).

### Comparison of the results of the rheology experiments for the 1-octanol gels of 4/TNF (1:1) and 4/TNF (1:0.5):

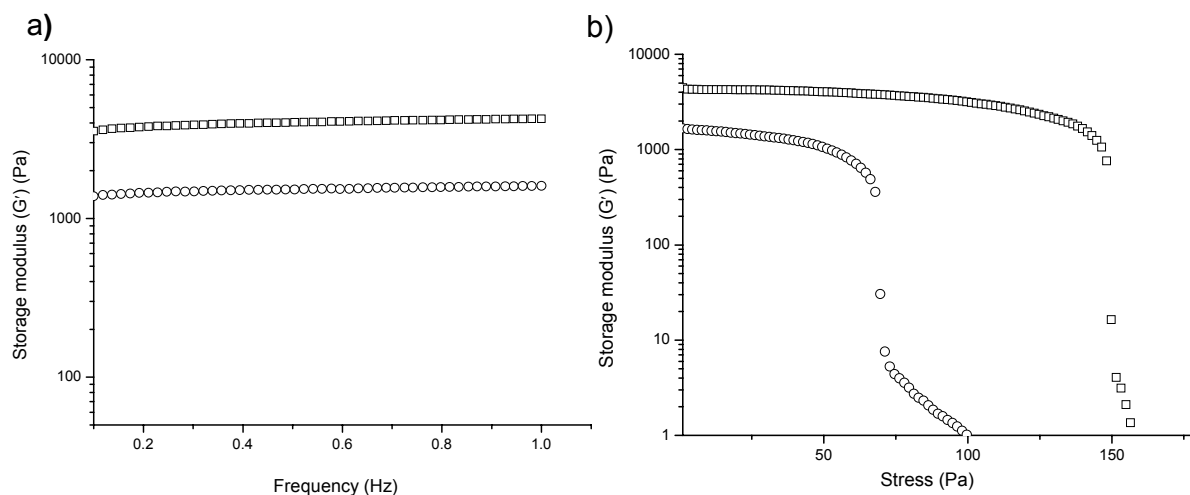

**Figure S5.** (a) Dynamic frequency sweep experiment (at a constant stress of 6 Pa) and (b) stress sweep experiment (at a frequency of 1 Hz) with 1-octanol gels of 4/TNF (1:1) (square) and 4/TNF (1:0.5) (circle).

### References

1. Y. Ogata, J. Ishiguro and Y. Kitamura, *J. Org. Chem.*, 1951, **16**, 239; Dae-Yon Lee, J. F. Hartwig, *Org. Lett.*, 2005, **7**, 1169.
2. J. V. Crivello and S. Kong, *J. Polym. Sci., Part A: Polym. Chem.*, 2000, **38**, 1433.
3. *Vogel's Textbook of Practical Organic Chemistry*, 5<sup>th</sup> edition, p. 1027, Addison Wesley Longman Limited, Harlow, England, 1996.
4. A. Palanisamy and B. K. Barrell, *Org. Prep. Proced. Int.*, 1981, **13**, 368.
5. E. Ciganek, *J. Org. Chem.*, 1980, **45**, 1497.
6. J.-L. Pozzo, G.M. Clavier, M. Colomes and H. Bouas-Laurent, *Tetrahedron*, 1997, **53**, 6377; J.-P. Desvergne, T. Brotin, D. Meerschaut, G. Clavier, F. Placin, J.-L. Pozzo and H. Bouas-Laurent, *New. J. Chem.*, 2004, **28**, 234
